# Supplementary material for: A click-crosslinked dopamine-functionalized hydrogel for therapeutic delivery of stem cell-derived extracellular vesicles
Source: Royal Society of Chemistry journal article supplement (doi:10.1039/d5bm01730k), 2026-04-16
Supplement: d5bm01730k1.pdf [file d5bm01730k1.pdf]

## Supplementary Information

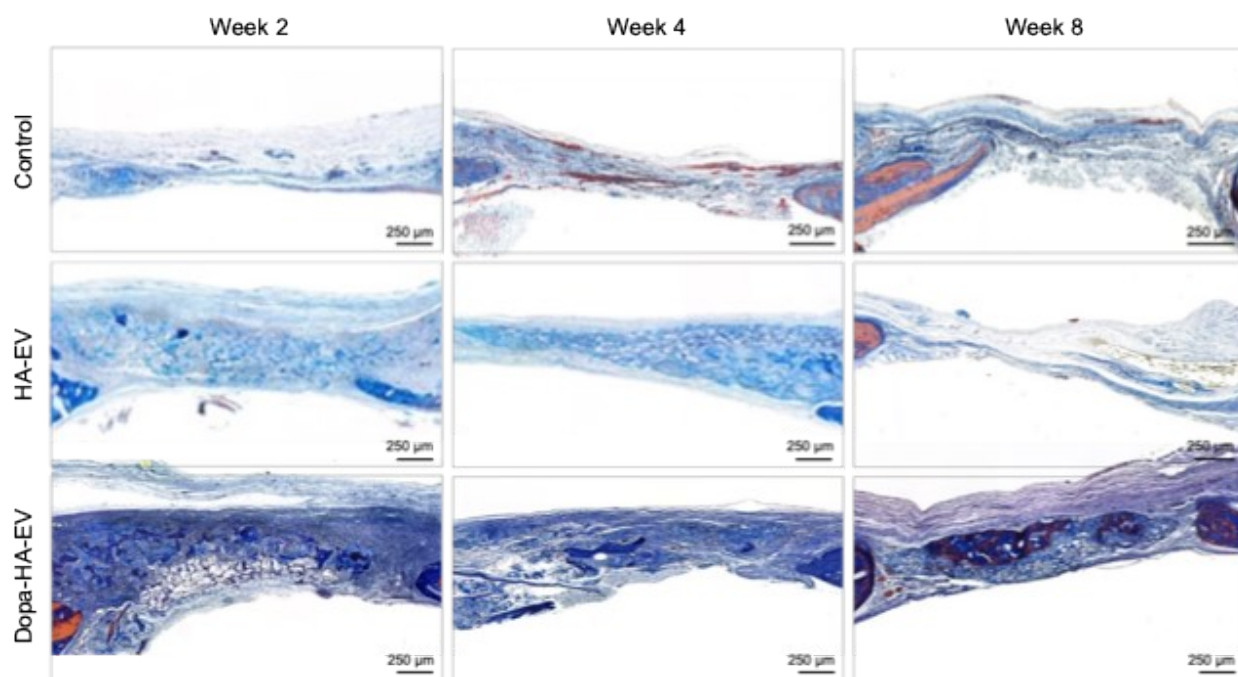

**Supplementary Figure 1.** Histological evaluation using modified Tetrachrome staining, with newly formed bone (mineralized bone matrix, red) and osteoid (unmineralized bone matrix, blue).
